# Supplementary material for: Cystathionine Gamma-Lyase Regulate Psilocybin Biosynthesis in Gymnopilus dilepis Mushroom via Amino Acid Metabolism Pathways
Source: MDPI journal article supplement (doi:10.3390/jof8080870), 2022-08-18
Supplement: s1 [file s1]

**Table S1.** DEGs with conserved domains in overlapping sets of P\_S\_U and SAH\_D.

| Transcript/ Gene Name | Conserved Domains                                                                   |
|-----------------------|-------------------------------------------------------------------------------------|
| MSTRG.1324.1          | TRX_family/ Thioredoxin_like super family/ RPA_2b-aaRSs_OBF_like super family       |
| g5534                 | Aldo-keto reductase (AKR) superfamily                                               |
| g11932                | Major Facilitator Superfamily                                                       |
| g6062                 | fungal_TF_MHR/ PHA02682 super family/ fungal_TF_MHR                                 |
| g1172                 | RT_like super family/ EEP super family                                              |
| g10415                | Epoxide hydrolase N-terminus                                                        |
| g13879                | Methyltransferase/ AdoMet_MTases super family                                       |
| g14240                | Ctr copper transporter family                                                       |
| g17528                | Aldo-keto reductase (AKR) superfamily                                               |
| g18490                | Alpha-crystallin domain (ACD) of alpha-crystallin-type small(s) heat shock proteins |
| g6371                 | CTH/ methionine gamma-lyase/ Cys/Met metabolism PLP-dependent enzyme                |

**Table S2.** DEGs with conserved domains in overlapping sets of P\_S\_D and SAH\_U.

| Transcript/ Gene Name | Conserved Domains                                                                                 | Transcript/ Gene Name | Conserved Domains                                                     |
|-----------------------|---------------------------------------------------------------------------------------------------|-----------------------|-----------------------------------------------------------------------|
| g6994                 | Rossmann-fold NAD(P)(+)-binding proteins                                                          | g2292                 | Thioredoxin-like domain/Glucosyltransferase                           |
| g18588                | Rossmann-fold NAD(P)(+)-binding proteins/ choline dehydrogenase                                   | g10210                | maltase-glucoamylase                                                  |
| g18589                | Putative thiazole synthesis                                                                       | g10234                | Asp-tRNA(Asn)/Glu-tRNA(Gln) amidotransferase subunit GatB             |
| g1624                 | Ankyrin repeat [Signal transduction mechanisms]                                                   | g10647                | FAD dependent oxidoreductase                                          |
| g7989                 | glutamyl-tRNA synthetase                                                                          | g2774                 | Nucleotide-Binding Domain of the sugar kinase/HSP70/actin superfamily |
| g19472                | DUF4470 super family                                                                              | g11689                | YEATS domain family, chromatin reader proteins                        |
| g8168                 | N-terminal domain of mixed lineage kinase domain-like protein (MLKL) and similar proteins         | g13386                | P-loop containing Nucleoside Triphosphate Hydrolases                  |
| g278                  | Glyco_18 domain                                                                                   | g3789                 | DNA mismatch repair ATPase MutS                                       |
| g8878                 | Putative threonine/serine exporter                                                                | g13987                | Protein Kinases, catalytic domain                                     |
| g8818                 | Catalase-like heme-binding proteins and protein domains                                           | g5642                 | alpha/beta hydrolases                                                 |
| g8821                 | ALG3 protein                                                                                      | g14566                | GTP cyclohydrolase II (RibA)                                          |
| g8836                 | NADPH-dependent FMN reductase                                                                     | g4685                 | Heterokaryon incompatibility protein Het-C                            |
| g8860                 | Tetraspanin family                                                                                | g15519                | Rossmann-fold NAD(P)(+)-binding proteins                              |
| g9534                 | cyclin box found in Saccharomyces cerevisiae G1/S-specific cyclin PCL1, PCL2 and similar proteins | g4827                 | G-protein alpha subunit                                               |
| g16617                | Cytochrome b5-like Heme/Steroid binding domain                                                    | g17824                | FAD binding domain                                                    |

**Table S3.** The primers of DEGs for qRT-PCR.

| Name            | Forward Primer (5' to 3') | Reverse Primer (5' to 3') |
|-----------------|---------------------------|---------------------------|
| <i>gapdh</i>    | GGCGGAGATAATGACCTTCTT     | CCACTGGTGCTGAGTACATT      |
| <i>ras</i>      | GTATCCAGGACATCGAGAAGAG    | GGAAGTCTGCTCTGACTATT      |
| <i>gdcth1</i>   | GAAACTGGAGCTGTGATTCTT     | TACTCAAAGCCCTTGTGGATG     |
| <i>gdcth2</i>   | AGAACTTCAAGCCGTGGTAG      | GTGTCATCGTTGACTCTGGAA     |
| <i>gdcth3</i>   | GACGTACAAGCAGTCAGGAAT     | CGCCTCAAGATAGGCAAGAG      |
| <i>gdmeth17</i> | GGGTGTTTCTCGAGGTATTGAG    | GCTTCTGCAAGGACTTGAAAC     |
| <i>gdsds</i>    | CCAATCTACGCTGGACGTTT      | GATCTTGGGCAACCAACTCT      |

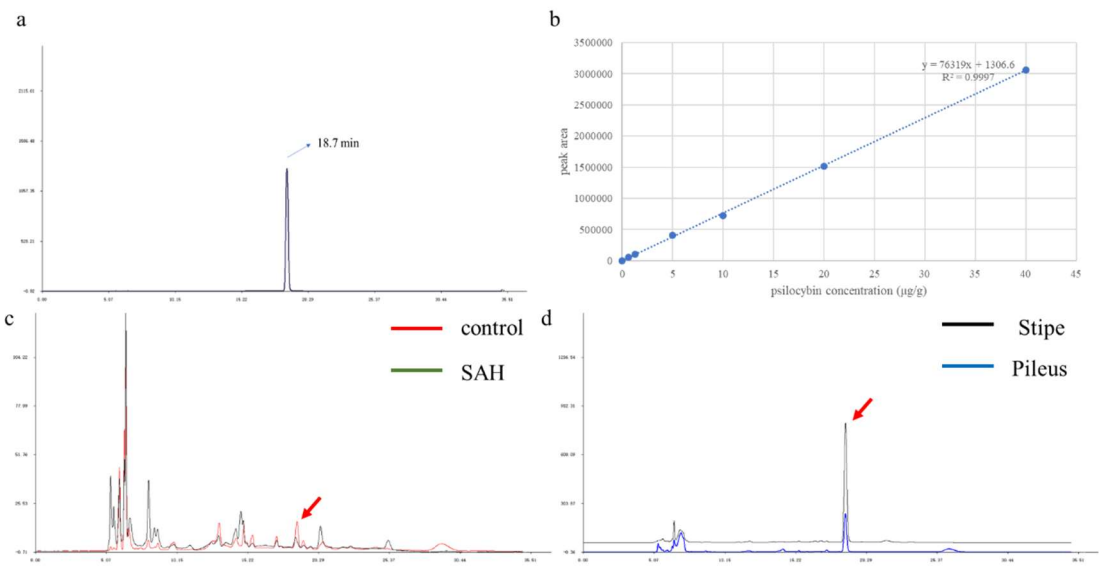

**Figure S1.** UPLC profiles of reference substances (a), linear equation of psilocybin standard substances (b), UPLC profiles of samples treated by SAH (c), UPLC profiles of samples of stipe and pileus (d).

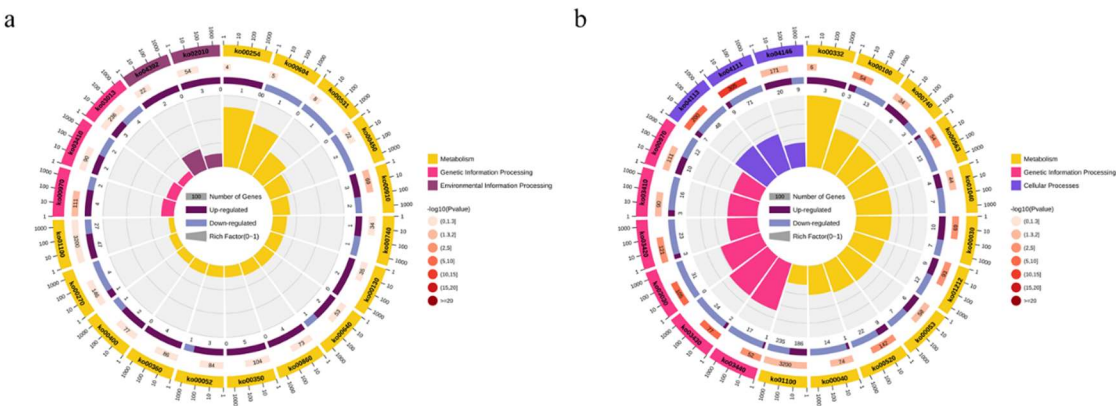

**Figure S2.** KEGG enrichment analysis of DEGs under different treatments (a) and parts (b) of *G. dilepis*.

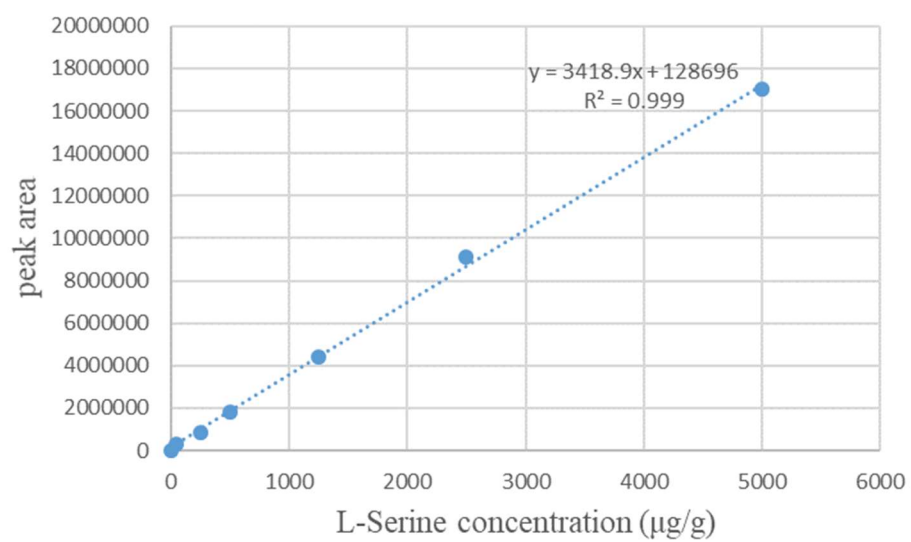

**Figure S3.** The linear equation of L-serine standard substances.
